# Supplementary material for: Blue phosphorene/graphene heterostructure as a promising anode for lithium-ion batteries: a first-principles study with vibrational analysis techniques
Source: Royal Society of Chemistry journal article supplement (doi:10.1039/c8ta09423c), 2018-11-29
Supplement: c8ta09423c1.pdf [file c8ta09423c1.pdf]

## Supporting Information

# Blue Phosphorene/Graphene Heterostructure as a Promising Anode for Lithium-Ion Batteries: A First-Principles Study with Vibrational Analysis Techniques

Yan Li,<sup>a,b</sup> Wenting Wu,<sup>c</sup> Fei Ma<sup>a,b</sup>

<sup>a</sup> State Key Laboratory for Mechanical Behavior of Materials, Xi'an Jiaotong University, Xi'an, Shaanxi, 710049, China

<sup>b</sup> Collaborative Innovation Center of Suzhou Nano Science and Technology, Xi'an Jiaotong University, Suzhou, Jiangsu, 215123, China

<sup>c</sup> North West Electric Power Design Institute, Xi'an, Shaanxi, 710075, China

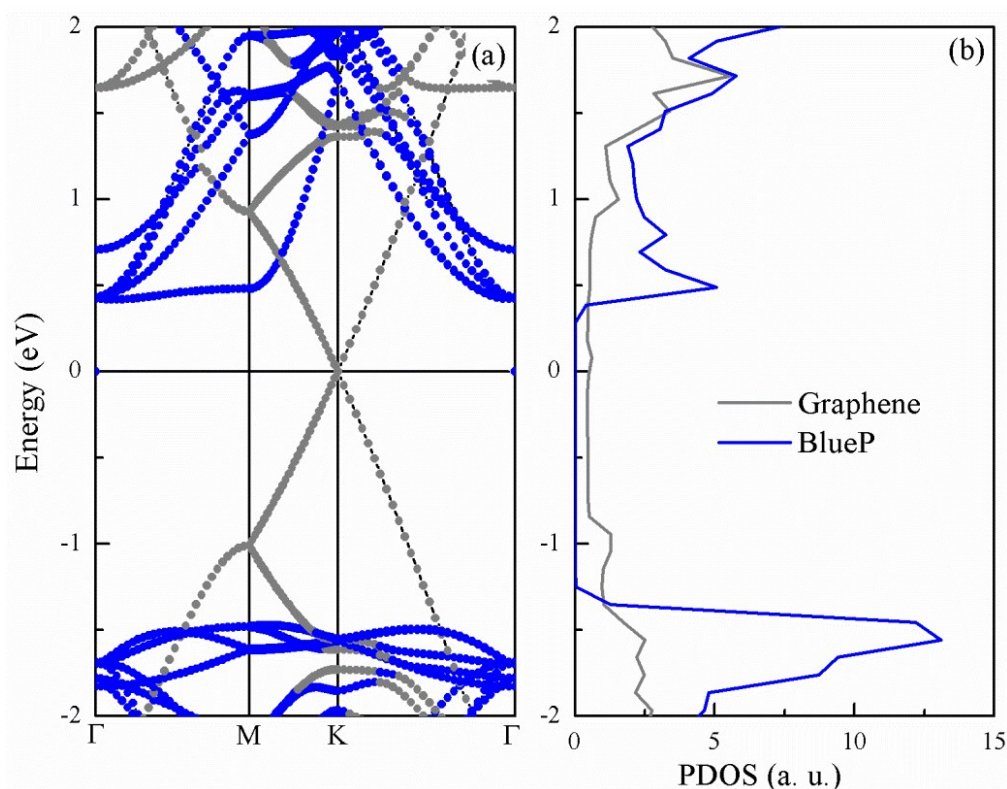

Fig. S1 (a) Band structure and (b) Partial density of states (PDOS) of BlueP/G heterostructure calculated based on D2 method. The Fermi level is set to 0. The blue and grey solid circles represent the projected weight of BlueP and graphene, respectively.

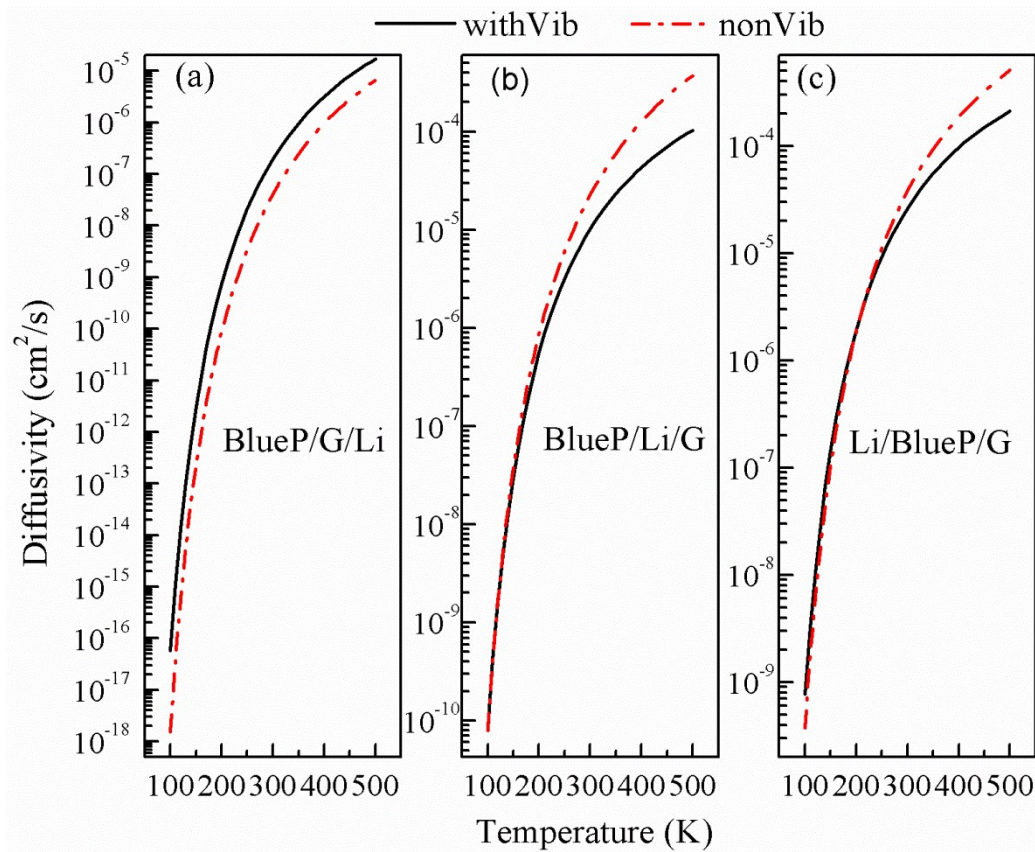

Fig. S2 Diffusivity of Li (a) on outside surface of graphene (BlueP/G/Li), (b) through the interlayer of BlueP/G heterostructure (BlueP/Li/G) and (c) on outside surface of BlueP (Li/BlueP/G). The solid black lines and the dashed red lines denote the diffusivity with and without the vibrational contribution, respectively.

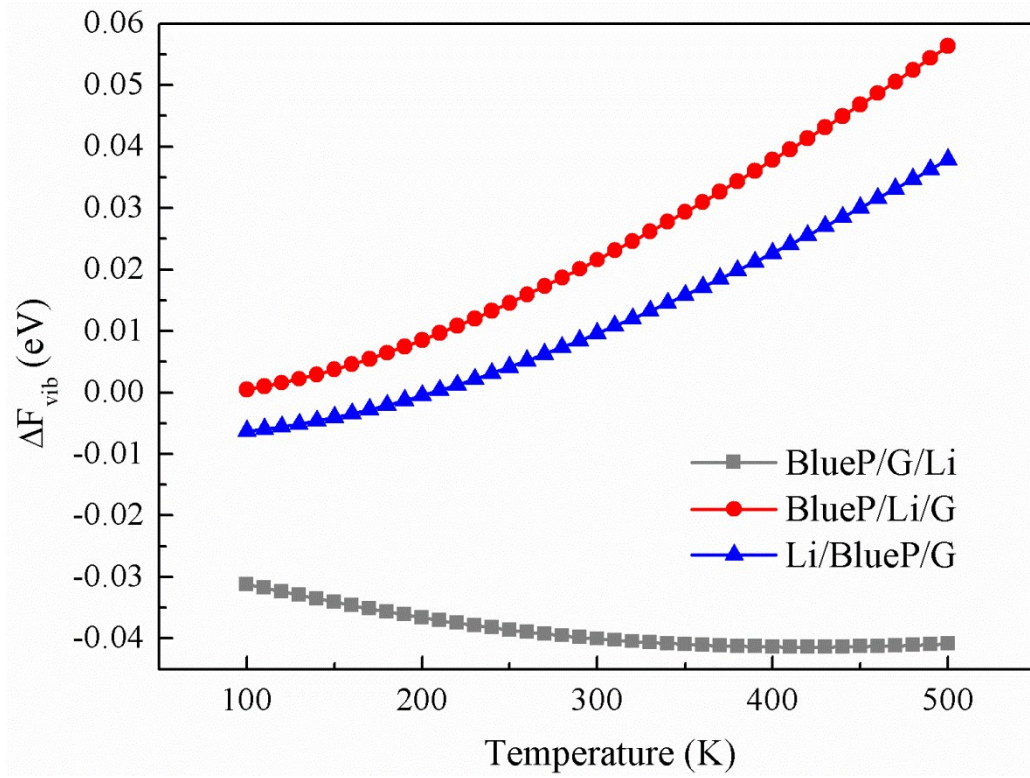

Fig. S3 Evolution of the change in the vibrational Helmholtz free energy ( $\Delta F_{vib}$ ) in the temperature range of 100 to 500 K.

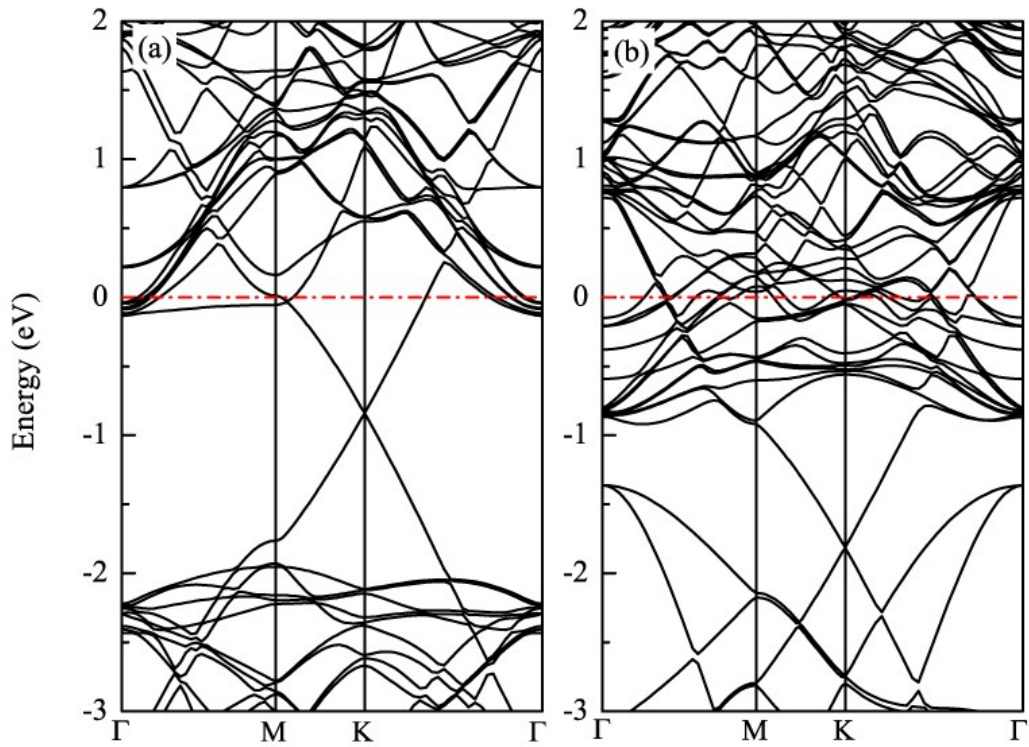

Fig. S4 Band structures of (a)  $\text{Li}_3\text{P}_{18}\text{C}_{32}$  and (b)  $\text{Li}_{22}\text{P}_{18}\text{C}_{32}$ . The fermi level is set to zero.

Table SI Li Adsorption Site, Binding Energy  $E_b$ , Charge Transfer of Li, P, C Atoms,  $\Delta Q_{Li}$ ,  $\Delta Q_P$ ,  $\Delta Q_C$ , respectively, Equilibrium Interlayer Distance  $d$ , calculated based on D2 level.

| System     | Li site | $E_b$ (eV) | $\Delta Q_{Li}$ (e) | $\Delta Q_P$ (e) | $\Delta Q_C$ (e) | $d$ (Å) |
|------------|---------|------------|---------------------|------------------|------------------|---------|
| BlueP/Li   | $V_P$   | -2.07      | -0.89               | 0.89             | -                | -       |
| G/Li       | $H_C$   | -1.56      | -0.91               | -                | 0.91             | -       |
| Li/BlueP/G | $V_P$   | -2.11      | -0.89               | 0.78             | 0.11             | 3.48    |
| BlueP/G/Li | $H_C$   | -1.71      | -0.91               | 0.15             | 0.76             | 3.46    |
| BlueP/Li/G | $V_I$   | -2.79      | -0.87               | 0.52             | 0.35             | 3.60    |

Table SII Li Adsorption Site, Binding Energy  $E_b$ , Charge Transfer of Li, P, C Atoms,  $\Delta Q_{Li}$ ,  $\Delta Q_P$ ,  $\Delta Q_C$ , respectively, Equilibrium Interlayer Distance  $d$ , calculated based on D3-BJ level.

| System     | Li site | $E_b$ (eV) | $\Delta Q_{Li}$ (e) | $\Delta Q_P$ (e) | $\Delta Q_C$ (e) | $d$ (Å) |
|------------|---------|------------|---------------------|------------------|------------------|---------|
| BlueP/Li   | $V_P$   | -2.00      | -0.88               | 0.88             | -                | -       |
| G/Li       | $H_C$   | -1.23      | -0.90               | -                | 0.90             | -       |
| Li/BlueP/G | $V_P$   | -2.07      | -0.88               | 0.77             | 0.11             | 3.52    |
| BlueP/G/Li | $H_C$   | -1.33      | -0.90               | 0.16             | 0.74             | 3.50    |
| BlueP/Li/G | $V_I$   | -2.32      | -0.87               | 0.53             | 0.34             | 3.62    |

Table III Diffusion Barrier of Li on different substrates calculated based on D2, D3 and D3-BJ methods.

| System     | Barrier (eV) |       |       |
|------------|--------------|-------|-------|
|            | D2           | D3    | D3-BJ |
| BlueP/Li   | 0.148        | 0.129 | 0.119 |
| G/Li       | 0.380        | 0.303 | 0.293 |
| Li/BlueP/G | 0.150        | 0.135 | 0.124 |
| BlueP/Li/G | 0.340        | 0.147 | 0.156 |
| BlueP/G/Li | 0.387        | 0.296 | 0.283 |
